# Supplementary material
Source: HighWire-hosted journal article supplement (https://www.annfammed.org/highwire/filestream/8699/field_highwire_adjunct_files/0/Radesky_SuppApp.pdf)
Supplement: Radesky_SuppApp.pdf [file Radesky_SuppApp.pdf]

Supplementary material for:

Radesky JS, Eisenberg S, Kistin CJ, Gross J, Block G, Zuckerman B, Silverstein M. Overstimulated consumers or next-generation learners? parent tensions about child mobile technology use. *Ann Fam Med*. 2016;14(6):503-508.

## Appendix 1: Focus Group and Interview Guides

For each participant:

1. Please tell me about your family and who lives in your household, including ages and genders of the children.
2. What types of digital devices – such as smartphones, tablets – or computers do you have in your house? Who owns them? Who uses them?

### *Child Use*

3. Can you tell us about what rules you have for when and how much your child is allowed to use these devices?
4. What sort of apps do they use? What are their favorites?
5. How do you pick good apps, or keep track of what your child is downloading?
6. Can you tell us about how you came up with those rules?
7. Tell us about a time that using a mobile device with your child was really helpful.
8. What do you think children (ask specific to their child's age range) can learn from apps?
9. How do you want your child's doctor to talk to you about media?

### *Parent Use*

10. What do you mostly use your mobile device(s) for when around your children?
11. Do you ever notice changes in your child's behavior when you are using a mobile device? If so, what happens? Can you describe the experience from your own perspective?
12. What do you think about newspaper articles or blogs that criticize parents for getting too "distracted" with their phones?
13. Can you talk a little bit about how you feel about your phone? What would happen if it broke?
